# Supplementary material for: Basic activities of daily living and associated factors: A cross-sectional study of the elderly in a tertiary care center, south-east Nigeria
Source: Research Square preprint supplement (doi:10.21203/rs.3.rs-6895572/v1), 2025-08-06
Supplement: Supplementary file 1 [file 8286ea6654013aa037e07f1f.docx]

RESEARCH QUESTIONNAIRE

Introduction

This is a research questionnaire on the dissertation topic: “Assessment of Socio-demographic characteristics, and functional status among the elderly attending the General Outpatient Clinic of Federal Teaching Hospital, Abakaliki”.

The dissertation is a requirement for the award of fellowship in the Faculty of Family Medicine of the National Postgraduate Medical College. To achieve this goal, your participation and co-operation is needed. The information you give will be treated with the highest level of confidentiality and will take you a few minutes to answer. It will also involve taking some measurements on you. This questionnaire consists of 2 sections; A and B. Kindly give only one response for each question or information required except where otherwise instructed.

Thank you for your co-operation.

SECTION A

Sex……………. Code number…….. Date……………

Socio-demographic Characteristics:

1. How old are you?

Age group in years

1. 65-70
2. 71-75
3. 76-80
4. > 80
5. What is your marital status?
6. Married
7. Widow(er)
8. Divorced
9. Not married
10. What is your occupation?
11. Farming
12. Trading
13. None (Retiree)
14. Others (specify)………………………
15. What is your educational level?
16. Standard 6
17. Primary
18. Secondary
19. Tertiary
20. None
21. How much do you earn per month as income?
22. Below N1000
23. Between N1000 – N5000
24. Between N5100 – N10,000
25. > N10,000
26. What is your religious inclination?
27. Christianity
28. Islam
29. ATR
30. Others (specify)…………………………..
31. Do you receive care whenever you need it?
32. Yes
33. No
34. If the answer to (7) above is “Yes”, what is your source of care?
35. Family members
36. Friends
37. Hired help
38. Neighbours
39. Do you receive any social support?
40. Yes
41. No
42. If the answer to (9) above is “Yes”, what is the source of support?
43. Families
44. Individuals
45. Government
46. Churches/Mosques
47. NGOs
48. If the answer to (9) above is still “Yes”, how often does such support come?
49. Always
50. Sometimes
51. Rarely
52. How long does it take you to get to your source of food/drug supply?
53. Ten minutes
54. Twenty minutes
55. Thirty minutes
56. One hour
57. Over one hour
58. How often is transportation service available to you when you need it?
59. None of the time
60. Some of the time
61. Most of the time
62. All of the time

SECTION B (FUNCTIONAL STATUS ASSESSMENT QUESTIONNAIRE)

Score 0 if option “a” is chosen, 1 if option “b”, 2 if option “c”, 3 if option “d”, 4 if option “e”. Lower scores infer better function.

1. Are you able to walk?
2. Yes, without help
3. Yes, with a stick or walker
4. Yes, with the help of another person
5. Not at all
6. Can you transfer out of bed?
7. Yes, alone without assistance
8. Yes, with the help of a transfer board
9. Yes, with the help of ≥ 1 person
10. Yes, with the help of both another person and transfer board
11. Not at all
12. Are you able to turn over on your side in bed?
13. Yes, without help
14. Yes, with assistive device
15. Yes, with some help from another person
16. No, must be turned
17. Are you able to wash dishes/clothes?
18. Yes
19. No
20. Are you able to prepare you own hot dinner?
21. Yes
22. No, but I am able to heat already prepared meal
23. No, but I am able to prepare roasted yam
24. Not at all
25. Are you able to manage money (pay bills, keep and write cheque books)?
26. Yes
27. Partially but not major bills and balancing a cheque book
28. Can sign cheque but cannot handle even minor transactions
29. No
30. Are you able to use the telephone?
31. Yes, including dialing and answering the call
32. Yes, but unable to dial
33. Yes, but not able to dial or pick up the receiver
34. No
35. Are you able to feed yourself?
36. Yes, without help
37. Yes, with assistance
38. No, but can eat if feed
39. No
40. Are you able to dress yourself in clothes?
41. Yes, without help
42. Yes, with minimal assistance
43. Partially but with assistance
44. No, completely dependent on someone
45. Are you able to bathe yourself in a tub or shower?
46. Yes, without help
47. Yes, with assistance
48. No, completely dependent on someone
49. Are you able to use the toilet?
50. Yes, without help
51. Yes, with assistive device
52. Yes, with help from another person
53. Yes, with assistive device and help from someone
54. No, unable to do so
55. Are you able to grasp a cup or cloth with your hand?
56. Yes, either hand
57. Yes, only with one hand
58. No
59. Are you able to reach past your nose?
60. Yes, with arm fully extended at shoulder level
61. Yes, but can’t fully extend at shoulder level
62. No
63. Are you usually able to take your drugs daily?
64. Yes, without help
65. Yes, if the doses are set out by someone
66. No, must be administered by someone
67. No, does not take medications daily
